# Supplementary material for: Genome-based analysis of the family Paracoccaceae and description of Ostreiculturibacter nitratireducens gen. nov., sp. nov., isolated from an oyster farm on a tidal flat
Source: Front Microbiol. 2024 Apr 30;15:1376777. doi: 10.3389/fmicb.2024.1376777 (PMC11092380; doi:10.3389/fmicb.2024.1376777)
Supplement: Supplementary file 9 [file Table_1.XLSX]

## Sheet: Sheet1
Strains	Gene No.	Start	End	Strand	Gene Length	Gene function	KEGG No.	Symbol	Potential metabolism
FR2A1	gene_596	636433	635750	-	684	Respiratory nitrate reductase gamma chain (EC 1.7.99.4)	K00374	narI	Reduction of Nitrate to Nitrite
	gene_597	637148	636447	-	702	Respiratory nitrate reductase delta chain (EC 1.7.99.4)	K00373	narJ
	gene_598	638641	637145	-	1497	Respiratory nitrate reductase beta chain (EC 1.7.99.4)	K00371	narH
	gene_599	642405	638662	-	3744	Respiratory nitrate reductase alpha chain (EC 1.7.99.4)	K00370	narG
	gene_600	645149	642423	-	2727	Nitrate/nitrite transporter NarK/U 1 / Nitrate/nitrite transporter NarK/U	K02575	narK
	gene_601	645404	646120	+	717	Transcriptional regulator NarR	-	-
	gene_775	817933	816704	-	1230	Periplasmic FAD-containing sulfur oxidation protein SoxF	-	-	Oxidation of Thiosulfate to Sulfate
	gene_776	818699	817989	-	711	Periplasmic monoheme c-type cytochrome SoxE	K08738	-
	gene_777	819789	818704	-	1086	Periplasmic sulfane dehydrogenase, diheme c-type cytochrome subunit SoxD	K08738
	gene_778	821071	819773	-	1299	Periplasmic sulfane dehydrogenase, molybdopterin-containing subunit SoxC	-	-
	gene_779	822810	821086	-	1725	SoxZY-persulfide-sulfonate hydrolase, SoxB	K17224	SoxB
	gene_780	823773	822916	-	858	Sulfur oxidation cycle carrier protein SoxY-Cys110-persulfide--sulfur compound transferase, SoxA subunit	K17222	SoxA
	gene_781	824171	823842	-	330	Sulfur oxidation cycle carrier protein, SoxZ subunit	K17227	SoxZ
	gene_782	824617	824189	-	429	Sulfur oxidation cycle carrier protein, SoxY subunit	K17226	SoxY
	gene_783	825121	824645	-	477	Sulfur oxidation cycle carrier protein SoxY-Cys110-persulfide--sulfur compound transferase, SoxX subunit	-	-
	gene_784	825848	825276	-	573	Periplasmic thioredoxin SoxW	-	-
	gene_785	826608	825868	-	741	Cytochrome c-type biogenesis protein SoxV	K06196
	gene_786	826693	827082	+	390	Periplasmic thiol--disulfide oxidoreductase SoxS	-	-
MT2_5_38	gene_604	644789	645472	-	684	Respiratory nitrate reductase gamma chain (EC 1.7.99.4)	K00374	narI	Reduction of Nitrate to Nitrite
	gene_605	645486	646187	-	702	Respiratory nitrate reductase delta chain (EC 1.7.99.4)	K00373	narJ
	gene_606	646184	647680	-	1497	Respiratory nitrate reductase beta chain (EC 1.7.99.4)	K00371	narH
	gene_607	647701	651444	-	3744	Respiratory nitrate reductase alpha chain (EC 1.7.99.4)	K00370	narG
	gene_608	651462	654188	-	2727	Nitrate/nitrite transporter NarK/U 1 / Nitrate/nitrite transporter NarK/U	K02575	narK
	gene_609	654443	655159	+	717	Transcriptional regulator NarR	-	-
	gene_783	825832	827094	-	1263	Periplasmic FAD-containing sulfur oxidation protein SoxF	-	-	Oxidation of Thiosulfate to Sulfate
	gene_784	827117	827827	-	711	Periplasmic monoheme c-type cytochrome SoxE	K08738	-
	gene_785	827832	828917	-	1086	Periplasmic sulfane dehydrogenase, diheme c-type cytochrome subunit SoxD	K08738
	gene_786	828901	830214	-	1314	Periplasmic sulfane dehydrogenase, molybdopterin-containing subunit SoxC	-	-
	gene_787	830214	831938	-	1725	SoxZY-persulfide-sulfonate hydrolase, SoxB	K17224	SoxB
	gene_788	832044	832901	-	858	Sulfur oxidation cycle carrier protein SoxY-Cys110-persulfide--sulfur compound transferase, SoxA subunit	K17222	SoxA
	gene_789	832970	833299	-	330	Sulfur oxidation cycle carrier protein, SoxZ subunit	K17227	SoxZ
	gene_790	833317	833745	-	429	Sulfur oxidation cycle carrier protein, SoxY subunit	K17226	SoxY
	gene_791	833773	834249	-	477	Sulfur oxidation cycle carrier protein SoxY-Cys110-persulfide--sulfur compound transferase, SoxX subunit	-	-
	gene_792	834404	834976	-	573	Periplasmic thioredoxin SoxW	-	-
	gene_793	834996	835736	-	741	Cytochrome c-type biogenesis protein SoxV	K06196
	gene_794	835821	836210	+	390	Periplasmic thiol--disulfide oxidoreductase SoxS	-	-
bin.37	gene_514	33254	34519	-	1266	Periplasmic FAD-containing sulfur oxidation protein SoxF	-	-	Oxidation of Thiosulfate to Sulfate
	gene_515	34549	35232	-	684	Periplasmic monoheme c-type cytochrome SoxE	K08738	-
	gene_516	35445	36527	-	1083	Periplasmic sulfane dehydrogenase, diheme c-type cytochrome subunit SoxD	K08738
	gene_517	36520	37791	-	1272	Periplasmic sulfane dehydrogenase, molybdopterin-containing subunit SoxC	K00387	SUOX
	gene_518	37871	39586	-	1716	SoxZY-persulfide-sulfonate hydrolase, SoxB	K17224	SoxB
	gene_519	39699	40556	-	858	Sulfur oxidation cycle carrier protein SoxY-Cys110-persulfide--sulfur compound transferase, SoxA subunit	K17222	SoxA
	gene_520	40631	40960	-	330	Sulfur oxidation cycle carrier protein, SoxZ subunit	K17227	SoxZ
	gene_521	40983	41402	-	420	Sulfur oxidation cycle carrier protein, SoxY subunit	K17226	SoxY
	gene_522	41434	41907	-	474	Sulfur oxidation cycle carrier protein SoxY-Cys110-persulfide--sulfur compound transferase, SoxX subunit	-	-
	gene_523	42070	42630	-	561	Periplasmic thioredoxin SoxW	-	-
	gene_524	42650	43453	-	804	Cytochrome c-type biogenesis protein SoxV	K06196
	gene_525	43489	43869	+	381	Periplasmic thiol--disulfide oxidoreductase SoxS	-	-
