# Supplementary material for: Genome-based analysis of the family Paracoccaceae and description of Ostreiculturibacter nitratireducens gen. nov., sp. nov., isolated from an oyster farm on a tidal flat
Source: Front Microbiol. 2024 Apr 30;15:1376777. doi: 10.3389/fmicb.2024.1376777 (PMC11092380; doi:10.3389/fmicb.2024.1376777)
Supplement: Supplementary file 10 [file Table_2.XLSX]

## Sheet: Sheet1
Genus	Taxon	Assembly	Genome Size (bp)	Genomic GC content (%)	AAI values (%)
Thermohalobaculum	Limibaculum sediminis FT325	GCA_023487995.1	4318768	69.59	81.7
	Thermohalobaculum xanthum M0105	GCA_016623495.1	4055176	67.9
Albimonas	Albimonas pacifica CGMCC 1.11030	GCA_900113695.1	5014394	71.65	72.1-99.8
	Albimonas sp. CAU 1670	GCA_029223255.1	5845393	72.56
	Albimonas donghaensis DSM 17890	GCA_900106695.1	6027197	72.88
	bacterium NP49	GCA_002729325.1	5103009	71.25
	bacterium NAT33	GCA_002697785.1	5201795	70.87
Pontivivens	Pontivivens ytuae MT2928	GCA_015679265.1	4199362	67.17	70.0-100
	Pontivivens insulae CECT 8812	GCA_900302495.1	3547102	59.89
	Pontivivens insulae DSM 103361	GCA_003385715.1	3539463	59.91
	Monaibacterium marinum C7	GCA_900231835.1	3734267	58.86
	Pontibrevibacter nitratireducens h42	GCA_014235845.1	3545831	62.36
	bin.12	GCA_913061375.1	3068653	62.57
	Pontibrevibacter nitratireducens ALG8	GCA_011290545.1	3575444	62.17
Neptunicoccus	Paracoccaceae bacterium HE327_NSB064	GCA_018607905.1	3172758	53.25	73.8-99.4
	Amylibacter sp. IMCC11727	GCA_029854195.1	3452935	53.75
	Amylibacter sp. cluster3_bin.56	GCA_029253985.1	2980872	47.47
	Amylibacter sp. cluster4_bin.115	GCA_029252725.1	2781169	47.67
	Amylibacter cionae CGMCC 1.15880	GCA_014643735.1	4190336	56.49
	Neptunicoccus sediminis CY02	GCA_001719615.1	3863961	57.51
	Paracoccaceae bacterium P03SST1bin.12	GCA_018223125.1	3896796	57.47
	Amylibacter cionae m18	GCA_002860325.1	4286347	56.67
Paramylibacter	Amylibacter ulvae KCTC 32465	GCA_014652655.1	3169477	49.23	92.6
	Amylibacter kogurei 4G11	GCA_002742285.1	2982417	48.8
Amylibacter	Amylibacter marinus NBRC 110140	GCA_030160015.1	2721832	52.37
Halocynthiibacter	Paenihalocynthiibacter styelae MYP1-1	GCA_016123485.1	3724544	55.03	81
	Halocynthiibacter namhaensis RA2-3	GCA_000812685.1	3535512	52.82
Falsiroseicyclus	Pseudoroseicyclus tamaricis CLL3-39	GCA_012070395.1	3847176	69.56	65.9
	Pseudoroseicyclus tamaricis CLL3-39	GCA_010435925.1	3847176	69.56
Pseudoroseicyclus	Pseudoroseicyclus aestuarii CECT 9025	GCA_003217255.1	3444313	69.16
Limimaricola	Limimaricola pyoseonensis DSM 21424	GCA_900102015.1	3911774	70.26	80.6-100
	Limimaricola variabilis CECT 8572	GCA_014195545.1	3653427	67.73
	Limimaricola sp. G21655-S1	GCA_027213785.1	4233448	67.07
	Limimaricola soesokkakensis CECT 8367	GCA_900172345.1	3936691	67
	Limimaricola soesokkakensis DSM 29956	GCA_003014435.1	3830986	67.13
	Limimaricola cinnabarinus LL-001	GCA_000466965.1	3896245	66.71
	Limimaricola hongkongensis DSM 17492	GCA_000600975.2	3188840	68.35
	Limimaricola hongkongensis DSM 17492	GCA_000365005.1	3185912	68.36
	Limimaricola litoreus ASW11-118	GCA_024159025.1	3825019	67.42
	Limimaricola cinnabarinus 2B2-78	GCA_947500925.1	3797685	68.03
	Limimaricola cinnabarinus XM1	GCA_002723615.1	3800995	67.93
Marivivens	uncultured Rhodobacteraceae bacterium SRR7346984_bin.71	GCA_937864535.1	3697669	60.93	71.7-100
	Marivivens aquimaris GSB7	GCA_015220045.1	4051696	60.55
	Marivivens donghaensis HF1	GCA_011806565.1	3337074	60.83
	Marivivens niveibacter MCCC 1A06712	GCA_002150005.2	3072121	54.6
	Marivivens geojensis FJ12	GCA_023540835.1	2840705	56.65
	Marivivens sp. HF-Dia39	GCA_013373465.1	2493189	56.44
	Aestuarium zhoushanense G7	GCA_002850435.1	3336108	56.78
	Marivivens sp. JLT3646	GCA_001908835.1	3147211	56.03
	Aestuarium sp. MLJ.15	GCA_023253315.1	2870298	56.47
	Marivivens donghaensis CECT 8947	GCA_030410045.1	2842065	56.64
	Marivivens donghaensis KCTC 42776	GCA_023541015.1	3184122	56.28
Cognatishimia	uncultured Rhodobacteraceae bacterium 3-368-3Z	GCA_947489325.1	4012071	53.24
	uncultured Rhodobacteraceae bacterium 3-74-3Z	GCA_947488695.1	4112698	53.28
	Cognatishimia activa ECT2AJA-044	GCA_017798205.1	3252335	56.8
	Cognatishimia sp. DT_16	GCA_013215215.1	3631262	56
	Cognatishimia maritima DSM 28223	GCA_900129685.1	3284915	56.31
	Cognatishimia activa SOCE 004	GCA_026016445.1	3211994	53.69
	Cognatishimia activa CECT 5113	GCA_001458335.1	3362067	54.43
	Cognatishimia activa CECT 5114	GCA_001458235.1	3479689	54.46
	uncultured Rhodobacteraceae bacterium 452-3Z	GCA_947498415.1	3368440	53.09
	Cognatishimia sp. SS12	GCA_028369055.1	3106439	58.87
	Cognatishimia sp. 1_MG-2023	GCA_030548175.1	3163798	53.16
	uncultured Rhodobacteraceae bacterium 4-2064-3Z	GCA_947499725.1	3150978	54.6
	uncultured Rhodobacteraceae bacterium 4-2022-3Z	GCA_947495885.1	3242934	54.56	70.8-100
Sedimentitalea	Sedimentitalea xiamensis JM2-8	GCA_030164465.1	4750166	63.76	76.7-82.7
	Arenibacterium arenosum CAU 1593	GCA_016428585.1	3979826	64.17
	Rhodobacteraceae bacterium F11138	GCA_016521575.1	4482587	61.23
	Sedimentitalea nanhaiensis CGMCC 1.10959	GCA_900116455.1	4890154	60.78
	Sedimentitalea nanhaiensis DSM 24252	GCA_000473225.1	4948550	60.77
Parasedimentitalea	Sedimentitalea sp. CY04	GCA_011813015.1	4438236	54.96	81.8-100
	Zongyanglinia huanghaiensis CY05	GCA_009753675.1	4856535	54.21
	Zongyanglinia marina H18S-6	GCA_009765655.1	5037133	54.52
	Zongyanglinia marina DSW4-44	GCA_005771405.1	4852500	54.27
	Parasedimentitalea marina W43	GCA_004006175.1	5080916	55.86
	Paracoccaceae bacterium	GCA_013214575.1	5586975	57.59
	Parasedimentitalea psychrophila QS115	GCA_030285785.1	5005898	57.71
	Parasedimentitalea psychrophila QS115	GCA_027853795.1	4840425	57.81
Meridianimarinicoccus	Phycocomes zhengii LMIT002	GCA_003254465.1	4597081	66.96	75.2-98.9
	Meridianimarinicoccus roseus TG-679	GCA_003172915.1	4294927	65.93
	Rhodobacteraceae bacterium SC52	GCA_011040475.1	3893634	58.42
	Fluviibacterium aquatile SM1902	GCA_004358675.1	4226543	58.21
Oceaniglobus	Kandeliimicrobium roseum XY-R6	GCA_002869745.1	4408274	69.32	72.2-77.3
	Oceaniglobus indicus 1-19b	GCA_002751875.1	3670870	64.78
	Oceaniglobus trochenteri G4	GCA_020529025.1	4588933	64.89
	Oceaniglobus ichthyenteri YLY08	GCA_003057885.1	3906563	58.97
Roseinatronobacter	Roseibaca sp. Y0-43	GCA_020667835.1	3030432	63.49	72.1-100
	Roseibaca calidilacus HL-91	GCA_001517585.1	3354638	61.78
	Roseibaca calidilacus HL-91	GCA_001314645.1	3044387	61.93
	Roseibaca ekhonensis CECT 7235	GCA_900499075.1	3901528	61.62
	Roseibaca sp. MSM6	GCA_024305165.1	3612136	60.93
	Roseibaca domitiana V10	GCA_023336755.1	3364452	60.92
	Super_Day2_Bin.16	GCA_020832655.1	4079334	59.79
	Roseinatronobacter sp. HJB301	GCA_028745735.1	4836725	59.7
	P03SWT1bin.6	GCA_017510335.1	3614859	60.34
	Roseinatronobacter sp. S2	GCA_029581395.1	4445845	59.46
	coassembly_bin.17	GCA_020832445.1	4079334	59.79
	Paracoccaceae bacterium CSSed162cmA_498	GCA_007118295.1	3458747	62.59
	Paracoccaceae bacterium GEM2.Bin58	GCA_007695345.1	3262231	64.23
	Paracoccaceae bacterium CSSed11_41	GCA_003561595.1	3308399	64.33
	Paracoccaceae bacterium CSSed162cmB_268	GCA_007128135.1	3314669	64.87
	Paracoccaceae bacterium CSBr16_51	GCA_007116575.1	2652155	63.92
	Paracoccaceae bacterium PLM2.Bin49	GCA_007694945.1	3180227	62.63
	Paracoccaceae bacterium CSSed165cm_253	GCA_007134865.1	3084205	62.99
	Paracoccaceae bacterium LCM1.Bin36	GCA_007692585.1	3260974	62.47
	Natronohydrobacter sp. CSSed162cmA_52	GCA_007123015.1	2873656	61.14
	Natronohydrobacter thiooxidans AH01	GCA_001884735.1	4073955	63.01
	Natronohydrobacter sp. CSMAG_1209	GCA_030603695.1	2947918	60.3
	Roseinatronobacter sp. PBR18_bin58	GCA_022565265.1	3082344	59.64
	Paracoccaceae bacterium T3Sed10_182R1	GCA_003567315.1	2841593	63.48
	Natronohydrobacter sp. CSSed162cmB_566	GCA_007125005.1	2834062	59.28
	Natronohydrobacter sp. CSSed165cm_50	GCA_007131995.1	2934833	59.35
	Natronohydrobacter sp. CSSed162cmA_487	GCA_007118505.1	2805216	59.3
	Roseinatronobacter monicus DSM 18423	GCA_006716865.1	4725029	59.18
	Paracoccaceae bacterium CSBr16_160	GCA_007117365.1	3106336	59.89
	Paracoccaceae bacterium T1Sed10_33	GCA_003554265.1	4311449	59.41
	Paracoccaceae bacterium T3Sed10_56	GCA_003564625.1	3457832	59.6
	Paracoccaceae bacterium CSSed165cm_586	GCA_007130795.1	3174140	59.83
	Paracoccaceae bacterium B1Sed10_49	GCA_003550905.1	3486017	59.61
	Roseinatronobacter thiooxidans DSM 13087	GCA_003254005.1	3685266	60.09
	Roseinatronobacter thiooxidans ALG1	GCA_001870675.1	3504907	60.27
	Rhodobaca sp. CSSed162cmB_418	GCA_007126715.1	3261092	58.75
	Rhodobaca bogoriensis DSM 18756	GCA_014197665.1	3908741	59.35
	Rhodobaca bogoriensis DSM 18756	GCA_004366635.1	3908763	59.04
	Rhodobaca barguzinensis DSM 19920	GCA_004365885.1	3867412	59.01
	Rhodobaca barguzinensis alga05	GCA_001870665.2	3899419	58.99
Acidimangrovimonas	Acidimangrovimonas sediminis MS2-2	GCA_002871005.1	5284268	67.84	77.5-100
	SRR5242449_bin.17	GCA_913064775.1	4384556	66.31
	Defluviimonas sp. 20V17	GCA_000687435.1	4260257	66.33
	Allgaiera indica CGMCC 1.10859	GCA_014653075.1	4287609	66.3
	Allgaiera indica DSM 24802	GCA_900106675.1	4280693	66.29
Solirhodobacter	Paracoccaceae bacterium clean6052	GCA_027430775.1	3131132	63.07	72.4-99.8
	Paracoccaceae bacterium clean1035	GCA_027351185.1	3320884	63.06
	Solirhodobacter olei Pet-1	GCA_004010155.1	4778327	66.78
	Paracoccaceae bacterium REEB409	GCA_028875855.1	3862434	66.4
	Paracoccaceae bacterium RI_331	GCA_016124615.1	4253162	66.66
	Paracoccaceae bacterium clean1042	GCA_027351005.1	3351235	68.57
	Paracoccaceae bacterium clean6050	GCA_027430835.1	3682016	69.13
	Paracoccaceae bacterium clean507	GCA_027320885.1	3458517	69.11
Wagnerdoeblera	Gemmobacter intermedius 119/4	GCA_004054105.1	4059775	62.65	70.4-100
	Falsigemmobacter faecalis YIM 102744-1	GCA_003863335.1	4240178	63.05
	Gemmobacter nectariphilus DSM 15620	GCA_000429765.1	4523636	66.23
	Gemmobacter megaterium DSM 26375	GCA_900156815.1	4168088	64.9
	Gemmobacter megaterium CGMCC 1.11024	GCA_014636395.1	4121685	64.94
Tabrizicola rongguiensis	Tabrizicola rongguiensis J26	GCA_021491355.1	4198472	64.17	89.9
	SRR9109405_bin.18	GCA_945952585.1	3910532	65.16
Falsirhodobacter	Cereibacter flavus SYSU M79828	GCA_029846755.1	4019516	64.5	71.5-92.6
	Rhodobacter xinxiangensis TJ48	GCA_004959935.1	3972354	64.74
	Falsirhodobacter halotolerans KCTC 32158	GCA_022899245.1	3075853	65.62
	Falsirhodobacter sp. alg1	GCA_000739715.2	2921973	60.25
	Falsirhodobacter algicola PG104	GCA_018279165.1	2779574	66.36
	Falsirhodobacter sp. 20TX0035	GCA_028307215.1	3225911	66.74
	Falsirhodobacter deserti W402	GCA_004015795.1	2982257	63.44
Gemmobacter	Gemmobacter aquatilis DSM 3857	GCA_900110025.1	3964038	65.11	75.7-100
	Gemmobacter fulvus cpcc 100767	GCA_030846175.1	4346494	64.31
	Gemmobacter fulvus con5	GCA_018798885.1	4677627	64.08
	Gemmobacter fulvus con4	GCA_018729355.1	4576129	64.13
	Gemmobacter lanyuensis KCTC 23714	GCA_014652355.1	4037198	64.37
	Gemmobacter aquaticus CGMCC 1.7029	GCA_014645295.1	3939491	63.47
	Gemmobacter aquaticus a1-9	GCA_007859075.1	3989751	63.46
	Gemmobacter caeruleus N8	GCA_008271655.1	3992662	66.06
	Gemmobacter sp. new MAG-129	GCA_016792925.1	3419766	66
	Gemmobacter serpentinus HB-1	GCA_008973825.1	4262748	63.68
	Gemmobacter lutimaris YJ-T1-11	GCA_003570715.1	4661677	64.44
	uncultured Gemmobacter sp. SRR3901695_bin.9_CONCOCT_v1.1_MAG	GCA_937941795.1	4695683	64.6
	Gemmobacter sp. LW-1	GCA_001303875.1	4344434	64.78
	Gemmobacter nanjingensis KCTC 23298	GCA_014652195.1	5166352	64.57
	Gemmobacter caeni CGMCC 1.7745	GCA_007830625.1	5221872	64.69
	Gemmobacter caeni DSM 21823	GCA_003054195.1	5135347	64.72
Aliigemmobacter	Paracoccaceae bacterium ACE_PRO37	GCA_019454225.1	4156144	68.59	71.6
	Gemmobacter aestuarii CC-PW-75	GCA_004799285.1	3758696	66.19
Neogemmobacter	Gemmobacter tilapiae KCTC 23310	GCA_014652215.1	3623543	61.55
Tabrizicola	Paracoccaceae bacterium C5_concoct.bin.147	GCA_030697175.1	3665575	65.16	75.4-100
	Tabrizicola sp. C18_concoct.bin.166_sub	GCA_030694435.1	3921374	65.1
	Tabrizicola sp. CZS48M_Bin3_fgap_30860_1	GCA_030373185.1	3616173	63.3
	Rhodobacter sp. D8_MAG_00074	GCA_027489175.1	3770652	64.59
	Rhodobacter sp. D8_MAG_00044	GCA_027489815.1	4438271	63.94
	Tabrizicola piscis K13M18	GCA_003940805.1	4387422	64.08
	Paracoccaceae bacterium ZH-Jul18-90	GCA_947504705.1	3719300	62.33
	Tabrizicola sp. co.spades.DASTOOL.1kb_103	GCA_019750515.1	3561782	66.08
	Paracoccaceae bacterium C4_MAG_00083	GCA_027484915.1	3835135	65.62
	Tabrizicola sp. bin.65	GCA_022842145.1	4333412	65.34
	Tabrizicola sp. C18_maxbin.019	GCA_030694085.1	4625301	64.54
	Paracoccaceae bacterium CROMO_A_187	GCA_018333965.1	4058162	66.43
	Tabrizicola sp. new MAG-123	GCA_016793705.1	3835440	66.62
	Tabrizicola sp. new MAG-124	GCA_016792905.1	3788555	66.19
	Tabrizicola aquatica RCRI19	GCA_002900975.1	3870427	66.4
	Xinfangfangia sp. CSMAG_1281	GCA_030602305.1	4124401	66.4
	Xinfangfangia sp. RXS3_metabat.bin.19	GCA_024710265.1	3807534	68.4
	Tabrizicola soli CCTCC AB 2017177	GCA_015999335.1	4683966	67.59
	Xinfangfangia sp. RS342_metabat.bin.5	GCA_024708905.1	4012102	68.21
	Tabrizicola sp. Prado224	GCA_025458105.1	4108979	64.26
	Paracoccaceae bacterium D8_MAG_00066	GCA_027489355.1	4207543	66.69
	Rhodobacter sp. SY28-1	GCA_005222785.1	4284688	65.27
	Tabrizicola flagellatus SYSU G03088	GCA_008271465.1	3616516	67.71
	Tabrizicola sp. YIM 78059	GCA_004959785.1	3692026	65.87
	Rhodobacter sp. YIM 73028	GCA_004762095.1	3478491	65.69
	Rhodobacter calidifons M37P	GCA_011174775.1	3626721	67.46
	Tabrizicola thermarum YIM 73036	GCA_003574395.1	3653867	66.79
	Rhodobacter sp. SYSU G02214	GCA_008271475.1	3649086	66.94
	Rhodobacter sp. SYSU G02092	GCA_008271455.1	3556400	66.94
	Rhodobacter sp. SYSU G02094	GCA_008271445.1	3556416	66.94
Paragemmobacter	Rhodobacter sp. C4_MAG_00077	GCA_027484985.1	3636313	65.26	74.6-100
	D8_MAG_00063	GCA_027489375.1	3885329	65.47
	Gemmobacter straminiformis CAM-8	GCA_014243445.1	4120452	65.39
	Rhodobacter sp. C4_MAG_00087	GCA_027484865.1	4107736	63.95
	Gemmobacter aquarius HYN0069	GCA_003060865.1	4206589	63.95
	Rhodobacter sp. CACIA14H1	GCA_000500915.1	3874320	66.64
	Rhodobacter amnigenus HSP-20	GCA_019130055.1	4142744	66.18
	Rhodobacter amnigenus HSP-20	GCA_009908265.2	4142744	66.18
	Fuscovulum sp. YMD61	GCA_029953595.1	4185011	63.25
	Tabrizicola sp. TH137	GCA_002855575.1	4663447	66.01
	LE19-251.1F	GCA_027533045.1	4099551	65.54
	Paracoccaceae bacterium Clear-D3	GCA_014654775.1	4519349	65.25
	Paracoccaceae bacterium LE19-196.1H	GCA_027531365.1	3698062	65.2
	Rhodobacter kunshanensis HX-7-19	GCA_011059185.1	4464082	65.91
	Rhodobacter ruber CCP-1	GCA_009908315.1	3958066	66.21
	uncultured Rhodobacteraceae bacterium	GCA_958439195.1	4227222	61.73
	Paracoccaceae bacterium bin.139	GCA_022843025.1	3899670	64.02
	Paracoccaceae bacterium LE19-12.2D	GCA_027530585.1	4196300	63.55
	Paracoccaceae bacterium LE19-10.1C	GCA_027530395.1	4382562	63.63
Cypionkella	Pseudorhodobacter antarcticus ME-09jul19-80	GCA_945862435.1	2735193	57.72	69.9-99.9
	D1_MAG_00073	GCA_027482795.1	2890133	58.96
	D4_MAG_00039	GCA_027490955.1	2962799	58.98
	C4_MAG_00056	GCA_027485325.1	3243781	58.92
	Pseudorhodobacter antarcticus GE-03apr19-261	GCA_945860375.1	4562776	61.19
	Pseudorhodobacter sp. Ww154	GCA_024642045.1	3485874	60.43
	Cypionkella sp. QJ.12	GCA_023255415.1	2830685	59.33
	uncultured Pseudorhodobacter sp. ERR771080_bin.4	GCA_913062925.1	3147326	60.1
	Cypionkella sp. MAG_147	GCA_030728825.1	2789470	60.34
	E19_concoct.bin.84	GCA_030645115.1	3645074	62.42
	X3_MaxBin.022	GCA_009773375.1	3710459	62.43
	Pseudorhodobacter sp. PARRP1	GCA_002256245.1	4351260	61.8
	Cypionkella aquatica NBRC 111766	GCA_030161095.1	4043281	60.47
	Cypionkella sp. RYN_514	GCA_028290065.1	3568109	59
	Cypionkella sp. RYN_515	GCA_028290025.1	4299045	58.67
	Cypionkella psychrotolerans PAMC 27389	GCA_001294535.1	5079079	60.3
	C12_concoct.bin.13	GCA_030683675.1	4934379	60.26
	E6_metabat.bin.35	GCA_030652235.1	4799893	60.21
Stagnihabitans	Pseudorhodobacter antarcticus MiH-16apr19-200)	GCA_945871285.1	4598571	63.92	70.4-99.1
	Rhodobacter sp. KR11	GCA_025950525.1	4051788	65.08
	Stagnihabitans tardus CYK-10	GCA_009925085.1	4590930	66.04
	JR-DAM-100519-181	GCA_947371955.1	4851497	63
	RE-4nov15-233	GCA_947465065.1	2907839	59.7
	ME-09jul19-84	GCA_945862465.1	2921845	59.73
	RH-15aug16-285	GCA_947468085.1	3222846	59.08
	ZE-15may19-28	GCA_947489225.1	2986313	59.61
	Pseudorhodobacter antarcticus HRSG-E11-bin-97	GCA_943326205.2	2703219	59.81
Fuscibacter	SRR7346984_bin.0	GCA_937864445.1	3879671	64.57	73.9-90.3
	SRR6231161_bin.63	GCA_937927675.1	3419558	61.84
	Tabrizicola oligotrophica KMS-5	GCA_011008935.1	3850476	65.47
	labscale reactor_MAG23	GCA_027492585.1	4140112	66.23
	Tabrizicola sp. SY72	GCA_013328815.1	4415984	65.16
	Paracoccaceae bacterium MAG50	GCA_014859945.1	3375336	67.05
	Fuscibacter oryzae KVB23	GCA_016765795.1	3808773	63.07
	Rhodobacteraceae bacterium UBA1943	GCA_002336845.1	3621674	63.72
Pararhodobacter	Pararhodobacter oceanensis AM505	GCA_003076755.1	4085976	62.93
	Rhodobacter sp. HK-STAS-PROT-58	GCA_020637555.1	3639994	67.16
	Rhodobacter sp. HK-STAS-PROT-59	GCA_020637515.1	3457218	68.25
	Pararhodobacter zhoushanensis ZQ420	GCA_025949695.1	4654038	65.26
	Pararhodobacter zhoushanensis ZQ420	GCA_003990445.1	4839526	64.79
	Pararhodobacter aggregans D1-19	GCA_003075525.1	5079942	68.23
	Pararhodobacter aggregans DSM 18938	GCA_003054005.1	5073924	68.23
	Rhodobacter sp. NTK016B	GCA_017303295.1	4845009	65.35
	Pararhodobacter marinus CIC4N-9	GCA_003122215.1	4486134	66.75
	Cereibacter sphaeroides AmN35-2	GCA_020216045.1	4875863	66.36
	Pararhodobacter sp. CCB-MM2	GCA_001691415.1	5149122	65.95	71.9-100
Pseudotabrizicola	Cypionkella sp. Prado223	GCA_025458085.1	2873533	63.28	75.0-100
	Paracoccaceae bacterium Tobar12.5m-G12	GCA_021741405.1	4536455	60.33
	Tobar13m-G5	GCA_021741475.1	4535137	60.3
	Tobar13.5m-G3	GCA_021741245.1	4196036	60.21
	D1_MAG_00012	GCA_027484145.1	4966842	62.63
	Gemmobacter nectariphilus SulCav_FS06-10_64_121	GCA_020721445.1	3070172	63.96
	ZodW_Metabat.71	GCA_016936395.1	3068624	63.75
	Pseudotabrizicola algicola ETT8	GCA_010915705.1	4491281	64.39
	Pseudorhodobacter sp. MZDSW-24AT	GCA_002794355.1	3862774	63.75
	Pseudotabrizicola alkalilacus DJC	GCA_003443995.1	4610061	62.86
	C10_concoct.bin.8_sub	GCA_030684215.1	4438056	60.87
	E9_concoct.bin.1	GCA_030651845.1	3843903	60.96
	E21_concoct.bin.118	GCA_030656345.1	4698121	63.55
	Pseudotabrizicola formosa XJSP	GCA_002900965.1	3702758	63.42
	Tabrizicola sp. WMC-M-20	GCA_004765575.1	4431588	62.85
	Pseudotabrizicola sediminis DRYC-M-16	GCA_004745575.1	4040697	62.99
Phaeovulum	Phaeovulum vinaykumarii JA123	GCA_900217755.1	3485606	68.25
	Phaeovulum vinaykumarii DSM 18714	GCA_900156695.1	3481684	68.25
Rhodobacter	Rhodobacter maris JA276	GCA_900217815.1	3833743	65.07	79.1-100
	Rhodobacter sp. TJ_12	GCA_020023995.1	3577922	62.35
	Rhodobacter sp. JA431	GCA_900217725.1	3874755	61.06
	Rhodobacter aestuarii DSM 19945	GCA_900156655.1	3841151	61.14
	Rhodobacter aestuarii JA296	GCA_003053525.1	3841382	61.14
	Rhodobacter viridis JA737	GCA_003217355.1	3868365	65.34
	Rhodobacter capsulatus SP108	GCA_005144475.1	4227650	66.16
	Rhodobacter capsulatus DSM 938	GCA_900102155.1	3864762	66.31
	Rhodobacter capsulatus 37b4	GCA_029277405.1	3912233	66.23
	Rhodobacter capsulatus A12	GCA_014622665.1	3616128	66.47
	Rhodobacter capsulatus DSM 1710	GCA_003254295.1	3668822	66.54
	Rhodobacter capsulatus A52	GCA_001402725.1	3607570	66.5
	Rhodobacter capsulatus B41	GCA_001402715.1	3675736	66.53
	Rhodobacter capsulatus B6	GCA_000506425.2	3805767	66.4
	Rhodobacter capsulatus YW2	GCA_000506545.2	3771447	66.44
	Rhodobacter capsulatus YW1	GCA_000506525.2	3647740	66.65
	Rhodobacter capsulatus SB 1003	GCA_000021865.1	3871920	66.56
	Rhodobacter capsulatus SL	GCA_006546695.1	3793264	66.42
	Rhodobacter capsulatus Y262	GCA_000506965.2	3844355	66.57
	Rhodobacter capsulatus R121	GCA_000506565.2	3760694	66.58
	Rhodobacter capsulatus DE442	GCA_000505785.1	3760501	66.58
Paenirhodobacter	Sinirhodobacter ferrireducens CCTCC AB2012026	GCA_004022265.1	4066781	67.82	73.3-98.4
	Sinirhodobacter hankyongi BO-81	GCA_003664585.1	3801301	68.32
	Sinirhodobacter huangdaonensis CGMCC 1.12963	GCA_004022465.1	4146544	68.17
	Rhodobacter sp. 140A	GCA_003315475.1	4202110	67.94
	Paenirhodobacter enshiensis DW2-9	GCA_000740785.1	3439591	66.84
	Sinirhodobacter populi 07D10-4-3	GCA_004022185.1	4665164	65.44
	Sinirhodobacter populi D19-10-3-21	GCA_004022205.1	4603156	65.6
	Sinirhodobacter populi SK2B-1	GCA_004022215.1	4777466	65.46
	Sinirhodobacter populi 24D10-4-9	GCA_004022225.1	4429369	65.75
	Sinirhodobacter populi 2D-5	GCA_004022585.1	4493625	65.72
Sedimentimonas	Rhodobacter sp. LPB0142	GCA_001856665.1	3780829	66.9	79.1-98.9
	Paenirhodobacter sp. MME-103	GCA_001639985.1	3797065	67
	Sinirhodobacter sp. WL0062	GCA_021378075.1	3618253	64.14
	Sedimentimonas flavescens B57	GCA_019264375.1	3387528	64.1
	Sinirhodobacter sp. HNIBRBA609	GCA_027594485.1	3181659	64.31
	Sedimentimonas flavescens CAU 1646	GCA_025154035.1	3082363	64.46
	Sedimentimonas flavescens WL0115	GCA_025751615.1	3252518	64.25
Thioclava	Paracoccaceae bacterium GH2-2	GCA_004153385.1	3772574	59.64	77.3-100
	Thioclava sp. SK-1	GCA_001705665.1	4289091	57.23
	Thioclava dalianensis CGMCC 1.12325	GCA_900115035.1	4197592	62.47
	Thioclava dalianensis DLFJ1-1	GCA_000715505.1	4179056	62.48
	uncultured Thioclava sp. SRR5242449_bin.21	GCA_913064665.1	3719025	60.5
	Paracoccaceae bacterium ZodW_Metabat.253	GCA_016937195.1	2965688	59.88
	Thioclava indica DT23-4	GCA_000714545.1	3822068	60.28
	Thioclava atlantica 13D2W-2	GCA_000737065.1	3928443	65.3
	Thioclava pacifica DSM 10166	GCA_000714535.1	3728293	63.89
	Thioclava marina MAG-93	GCA_014359625.1	4145561	63.83
	Thioclava sp. JN11.013	GCA_014763865.1	3856190	64.06
	Paracoccaceae bacterium M0604	GCA_006226715.1	3728019	64.23
	Thioclava marina 11.10-0-13	GCA_002020135.1	3653331	64.09
	Thioclava sp. L04-15	GCA_002020275.1	3858094	63.94
	Paracoccaceae bacterium M2407	GCA_006226925.1	4409817	63.69
	Thioclava sp. F42-5	GCA_002213195.1	3924474	63.99
	Thioclava sp. F1Mire-8	GCA_002213165.1	3842802	64.06
	Thioclava nitratireducens M1-LQ-LJL-11	GCA_029917025.1	4315032	63.73
	Thioclava sp. F34-6	GCA_002213235.1	3930363	63.96
	Thioclava nitratireducens 25B10_4	GCA_001940525.2	4238255	63.8
	Thioclava sp. IC9	GCA_002213225.1	4085640	63.73
	Thioclava sp. NG1	GCA_003122275.1	4175114	63.78
	Thioclava sp. JM3	GCA_002213185.1	4175804	63.7
	Thioclava sp. ES.031	GCA_002563775.1	4019144	64.21
	Thioclava sp. F28-4	GCA_002020045.1	4580168	63.57
	Thioclava sediminum TAW-CT134	GCA_002020355.1	4131279	64.03
	Thioclava sp. F36-7	GCA_002020075.1	4301526	63.92
	Thioclava electrotropha Elox9	GCA_002085925.2	4395474	63.76
	Thioclava sp. DLFJ5-1	GCA_002020115.1	4330998	63.88
	Thioclava sp. DLFJ4-1	GCA_002020145.1	4361606	63.81
	Thioclava sp. JE_KL1	GCA_009296265.1	4409817	63.69
	Thioclava sp. F36-6	GCA_002020305.1	4060064	64.05
	Thioclava sp. UBA3469	GCA_002378135.1	3967616	64.21
	Thioclava electrotropha ERR599136_bin.101	GCA_913047685.1	4030256	64.12
	Thioclava sp. NAT82	GCA_002697245.1	4114335	63.7
Pseudothioclava	Pseudothioclava arenosa CAU 1312	GCA_002358085.1	2793629	65.29	78.3
	Defluviimonas nitratireducens MCCC 1A06955	GCA_029210495.1	3006268	63.84
Frigidibacter	Frigidibacter oleivorans XJ4	GCA_003993775.1	4051972	69.47	74.2-100
	Defluviimonas sp. MAG-86	GCA_014359755.1	3687038	68.43
	Frigidibacter mobilis cai42	GCA_001620265.1	4987611	66.53
	Frigidibacter sp. C8_maxbin.052	GCA_030695035.1	4308904	67.13
	Frigidibacter albus CGMCC 1.13995	GCA_014640395.1	4196145	67.58
	Frigidibacter albus SP32	GCA_010993795.1	4198170	67.58
	Frigidibacter albus SP32	GCA_009908165.1	4194345	67.58
	Frigidibacter albus SP32	GCA_009881095.1	4196409	67.58
Defluviimonas	Defluviimonas sp. WL0075	GCA_025751575.1	4128694	66.12	70.6-100
	Defluviimonas sp. WL0002	GCA_025751435.1	3818134	64.31
	Acidimangrovimonas sediminis FT324	GCA_025380365.1	4294115	66.99
	ACE_NR_PROT17	GCA_023954235.1	3395392	66.06
	HKST-UBA114	GCA_020446845.1	3410849	66.14
	HKST-UBA115	GCA_020446815.1	3469903	63.04
	Albidovulum inexpectatum DSM 12048	GCA_002927635.1	2997984	64.81
	Albidovulum sp. BIN44	GCA_030837825.1	3593834	68.91
	Defluviimonas sp. SB22	GCA_008933605.1	3656294	68.06
	SRR5166508_bin.25	GCA_937868055.1	3506289	67.88
	HK-STAS-PROT-56	GCA_020637675.1	3146448	67.69
	Defluviimonas denitrificans DSM 18921	GCA_002973535.1	4107985	65.68
	HK-STAS-PROT-54	GCA_020637635.1	2997984	64.81
	WOFB24	GCA_011620265.1	3908192	67.5
	Defluviimonas aquaemixtae CECT 8626	GCA_900302475.1	4235016	64.45
	Defluviimonas aestuarii JCM 18630	GCA_029961185.1	4242458	62.19
	Defluviimonas sp. WL0050	GCA_025751495.1	4054431	62.56
	Defluviimonas salinarum CAU 1641	GCA_026013545.1	5016967	66.61
	Defluviimonas sp. WL0024	GCA_025673475.1	4423452	66.77
